# Supplementary material for: Efficacy of subcutaneous interferon β-1a on MRI outcomes in a randomised controlled trial of patients with clinically isolated syndromes
Source: PubMed Central journal article supplement — J Neurol Neurosurg Psychiatry. 2013 Nov 29;85(6):647–53. doi: 10.1136/jnnp-2013-306289 (PMC4033030; doi:10.1136/jnnp-2013-306289), 2013-11-29

**Supplementary table S1**

## Conversion to multiple sclerosis (intent-to-treat population)

|                     | Cumulative probability at 2 years (%) <sup>*</sup> |                          |         | p Value <sup>†</sup>  |                      |                  |
|---------------------|----------------------------------------------------|--------------------------|---------|-----------------------|----------------------|------------------|
|                     | sc IFN $\beta$ -1a<br>tiw                          | sc IFN $\beta$ -1a<br>qw | Placebo | tiw versus<br>placebo | qw versus<br>placebo | tiw versus<br>qw |
| McDonald<br>2005 MS | 62.5                                               | 75.5                     | 85.8    | <0.001                | 0.008                | 0.009            |
| CDMS                | 20.6                                               | 21.6                     | 37.5    | <0.001                | 0.002                | 0.774            |

<sup>\*</sup>Kaplan–Meier estimates.

<sup>†</sup>Two-sided log-rank test, stratified by randomisation stratification factors.

CDMS, clinically definite multiple sclerosis; IFN, interferon; MS, multiple sclerosis; qw, once weekly; sc, subcutaneous; tiw, three times weekly.

**Supplementary table S2** Point estimates of CUA lesions per patient per scan during the double-blind period and treatment effect of sc IFN

$\beta$ -1a

|     |                            | LSM CUA lesions per patient per scan |                                  |                    | sc IFN $\beta$ -1a tiw versus placebo* |         | sc IFN $\beta$ -1a qw versus placebo* |         | sc IFN $\beta$ -1a tiw versus sc IFN $\beta$ -1a qw* |         |
|-----|----------------------------|--------------------------------------|----------------------------------|--------------------|----------------------------------------|---------|---------------------------------------|---------|------------------------------------------------------|---------|
|     |                            | sc IFN $\beta$ -1a tiw<br>(n=171)    | sc IFN $\beta$ -1a qw<br>(n=175) | Placebo<br>(n=171) | LSM ratio<br>(95% CI)                  | p Value | LSM ratio<br>(95% CI)                 | p Value | LSM ratio<br>(95% CI)                                | p Value |
| Age |                            |                                      |                                  |                    |                                        |         |                                       |         |                                                      |         |
|     | <30 years<br>(n=259)       | 0.71                                 | 1.76                             | 3.13               | 0.23 (0.14 to 0.36)                    | <0.001  | 0.56 (0.36 to 0.88)                   | 0.006   | 0.40 (0.26 to 0.64)                                  | 0.015   |
|     | $\geq$ 30 years<br>(n=258) | 0.47                                 | 0.60                             | 2.14               | 0.22 (0.14 to 0.34)                    | <0.001  | 0.28 (0.18 to 0.43)                   | <0.001  | 0.79 (0.50 to 1.23)                                  | 0.048   |
| Sex |                            |                                      |                                  |                    |                                        |         |                                       |         |                                                      |         |
|     | Male<br>(n=185)            | 0.67                                 | 1.16                             | 1.50               | 0.45 (0.26 to 0.76)                    | 0.012   | 0.77 (0.45 to 1.31)                   | 0.119   | 0.58 (0.34 to 1.01)                                  | 0.276   |
|     | Female                     | 0.39                                 | 0.71                             | 3.07               | 0.13 (0.09 to 0.19)                    | <0.001  | 0.23 (0.16 to 0.33)                   | <0.001  | 0.56 (0.38 to 0.82)                                  | 0.002   |

|                                 | LSM CUA lesions per patient per scan |      |      | sc IFN $\beta$ -1a tiw versus placebo* |        | sc IFN $\beta$ -1a qw versus placebo* |        | sc IFN $\beta$ -1a tiw versus sc IFN $\beta$ -1a qw* |        |
|---------------------------------|--------------------------------------|------|------|----------------------------------------|--------|---------------------------------------|--------|------------------------------------------------------|--------|
| (n=332)                         |                                      |      |      |                                        |        |                                       |        |                                                      |        |
| Steroid use during first attack |                                      |      |      |                                        |        |                                       |        |                                                      |        |
| Yes<br>(n=366)                  | 0.67                                 | 0.95 | 2.89 | 0.23 (0.16 to 0.34)                    | <0.001 | 0.33 (0.23 to 0.48)                   | <0.001 | 0.71 (0.48 to 1.04)                                  | 0.015  |
| No<br>(n=151)                   | 0.39                                 | 1.65 | 2.06 | 0.19 (0.10 to 0.35)                    | <0.001 | 0.80 (0.44 to 1.46)                   | 0.005  | 0.23 (0.12 to 0.44)                                  | 0.105  |
| Presentation of first event     |                                      |      |      |                                        |        |                                       |        |                                                      |        |
| Monofocal<br>(n=277)            | 0.66                                 | 1.23 | 1.94 | 0.34 (0.21 to 0.56)                    | <0.001 | 0.64 (0.39 to 1.04)                   | 0.013  | 0.54 (0.33 to 0.88)                                  | 0.173  |
| Multi-focal<br>(n=240)          | 0.50                                 | 1.05 | 3.43 | 0.15 (0.09 to 0.22)                    | <0.001 | 0.30 (0.20 to 0.46)                   | <0.001 | 0.48 (0.31 to 0.74)                                  | <0.001 |
| Gd+ lesions at baseline         |                                      |      |      |                                        |        |                                       |        |                                                      |        |
| 0<br>(n=304)                    | 0.27                                 | 0.58 | 1.69 | 0.16 (0.11 to 0.25)                    | <0.001 | 0.35 (0.23 to 0.52)                   | <0.001 | 0.47 (0.31 to 0.72)                                  | 0.007  |

|                        | LSM CUA lesions per patient per scan |      |      | sc IFN $\beta$ -1a tiw versus placebo* |        | sc IFN $\beta$ -1a qw versus placebo* |        | sc IFN $\beta$ -1a tiw versus sc IFN $\beta$ -1a qw* |        |
|------------------------|--------------------------------------|------|------|----------------------------------------|--------|---------------------------------------|--------|------------------------------------------------------|--------|
| $\geq 1$<br>(n=213)    | 1.06                                 | 1.93 | 3.97 | 0.27 (0.17 to 0.42)                    | <0.001 | 0.49 (0.31 to 0.76)                   | 0.001  | 0.55 (0.35 to 0.88)                                  | 0.173  |
| T2 lesions at baseline |                                      |      |      |                                        |        |                                       |        |                                                      |        |
| <9<br>(n=140)          | 0.24                                 | 0.29 | 0.72 | 0.33 (0.17 to 0.65)                    | 0.006  | 0.40 (0.22 to 0.75)                   | 0.035  | 0.83 (0.41 to 1.67)                                  | 0.440  |
| $\geq 9$<br>(n=377)    | 0.56                                 | 1.18 | 3.37 | 0.17 (0.12 to 0.23)                    | <0.001 | 0.35 (0.25 to 0.49)                   | <0.001 | 0.47 (0.34 to 0.66)                                  | <0.001 |

\*Treatment effects were estimated using a negative binomial model, with treatment as covariate and log number of scans as an offset variable; p values were calculated using a 2-sided stratified non-parametric analysis of variance model on ranked data, with effects for treatment group.

CUA, combined unique active; Gd+, gadolinium-enhancing; IFN, interferon; LSM, least squares mean; qw, once weekly; sc, subcutaneous; tiw, three times weekly.

**Supplementary figure S1** Last observed value of median changes from baseline in (A) T2, (B) T1 hypointense, and (C) T1-Gd+ lesion volume during the double-blind period (intent-to-treat population). Red lines represent the median, boxes represent the interquartile range. In all cases, the range extended beyond the limits of the axis. Gd+, gadolinium-enhancing; qw, once weekly; tiw, three times weekly

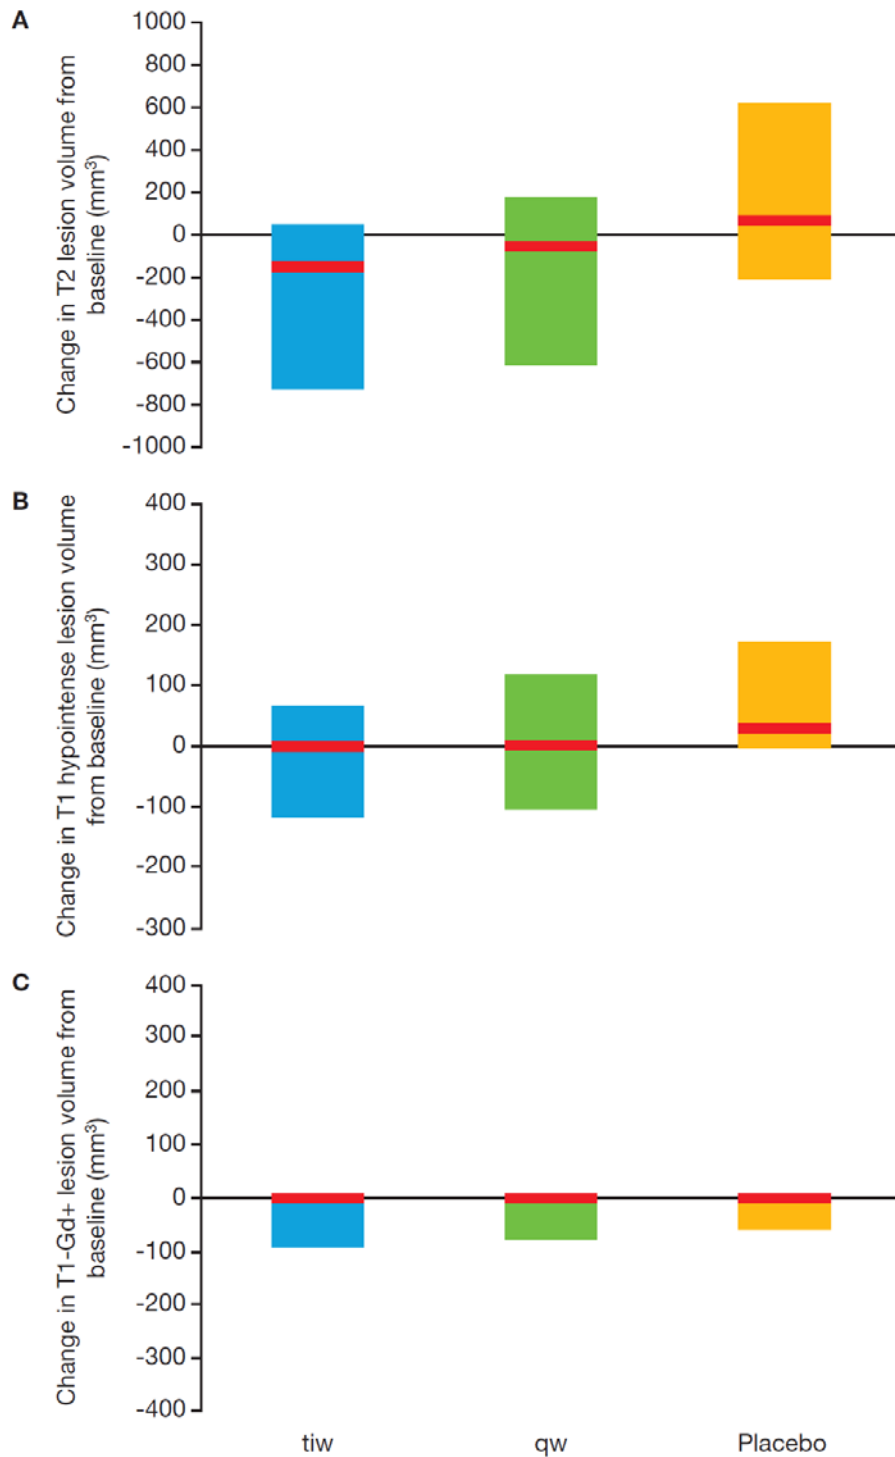

Supplement: jnnp-2013-306289-s1.pdf [file jnnp-2013-306289-s1.pdf]
